# Supplementary material for: Effects of shokyo ( Zingiberis Rhizoma ) and kankyo ( Zingiberis Processum Rhizoma ) on prostaglandin E 2 production in lipopolysaccharide-treated mouse macrophage RAW264.7 cells
Source: PeerJ journal article supplement (doi:10.7717/peerj.7725), 2019-09-17
Supplement: raw_data_Fig1.zip [file raw_data_Fig1.zip]

# Statistical analysis

Toshiaki Ara

## 1 cytotoxicity

### 1.1 shokyo

Simultaneous Tests for General Linear Hypotheses

Multiple Comparisons of Means: Dunnett Contrasts

Fit: `lm(formula = adjusted ~ drug1, data = dat)`

Linear Hypotheses:

|               | Estimate | Std. Error | t value | Pr(> t )    |
|---------------|----------|------------|---------|-------------|
| 100 - 0 == 0  | -5.543   | 2.456      | -2.257  | 0.10512     |
| 300 - 0 == 0  | -8.937   | 2.456      | -3.639  | 0.00912 **  |
| 1000 - 0 == 0 | -17.064  | 2.456      | -6.948  | < 0.001 *** |

---

Signif. codes: 0 '\*\*\*' 0.001 '\*\*' 0.01 '\*' 0.05 '.' 0.1 ' ' 1

(Adjusted p values reported -- single-step method)

### 1.2 kankyo

Simultaneous Tests for General Linear Hypotheses

Multiple Comparisons of Means: Dunnett Contrasts

Fit: `lm(formula = adjusted ~ drug1, data = dat)`

Linear Hypotheses:

|               | Estimate | Std. Error | t value | Pr(> t )   |
|---------------|----------|------------|---------|------------|
| 100 - 0 == 0  | 1.8685   | 0.6023     | 3.102   | 0.0233 *   |
| 300 - 0 == 0  | 0.1038   | 0.6023     | 0.172   | 0.9962     |
| 1000 - 0 == 0 | -12.2145 | 0.6023     | -20.279 | <0.001 *** |

---

Signif. codes: 0 '\*\*\*' 0.001 '\*\*' 0.01 '\*' 0.05 '.' 0.1 ' ' 1

(Adjusted p values reported -- single-step method)
