# Supplementary material for: Effects of shokyo ( Zingiberis Rhizoma ) and kankyo ( Zingiberis Processum Rhizoma ) on prostaglandin E 2 production in lipopolysaccharide-treated mouse macrophage RAW264.7 cells
Source: PeerJ journal article supplement (doi:10.7717/peerj.7725), 2019-09-17
Supplement: raw_data_Fig1.zip [file raw_data_Fig1.zip]

- Exp. 30
- Condition
  - drug1: shokyo (ug/ml)
  - experimental No. 4
  - treatment: 24h
- Measurement
  - WST-8
  - Date: 2017.11.8
- Cells
  - cells: RAW264.7, passages: NA
  - cell numbers:  $5 \times 10^4$  cells/well

|   | drug1 | mean  | SD  |
|---|-------|-------|-----|
| 1 | 0     | 100.0 | 6.6 |
| 2 | 100   | 94.5  | 1.5 |
| 3 | 300   | 91.1  | 1.3 |
| 4 | 1000  | 82.9  | 1.1 |

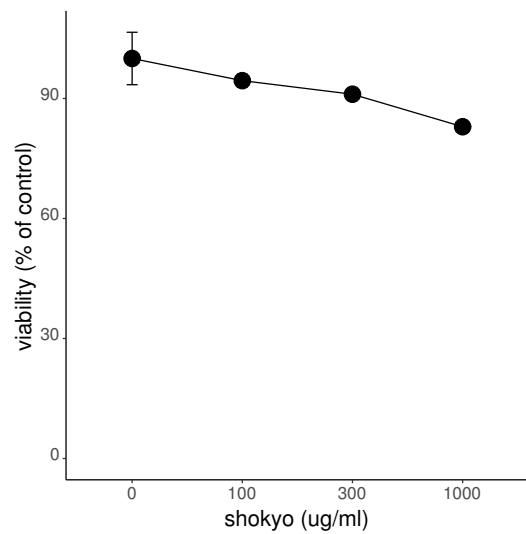

|   | OD    | mean  |
|---|-------|-------|
| 1 | 0.050 | 0.049 |
| 2 | 0.050 |       |
| 3 | 0.048 |       |
| 4 | 0.048 |       |
| 5 | 0.047 |       |
| 6 | 0.050 |       |
| 7 | 0.051 |       |
| 8 | 0.047 |       |

|    | drug1 | OD    | OD-blank | viability |
|----|-------|-------|----------|-----------|
| 1  | 0     | 0.926 | 0.877    | 109.2     |
| 2  | 0     | 0.846 | 0.797    | 99.3      |
| 3  | 0     | 0.832 | 0.783    | 97.5      |
| 4  | 0     | 0.803 | 0.754    | 93.9      |
| 5  | 100   | 0.823 | 0.774    | 96.4      |
| 6  | 100   | 0.811 | 0.762    | 94.9      |
| 7  | 100   | 0.798 | 0.749    | 93.3      |
| 8  | 100   | 0.797 | 0.748    | 93.2      |
| 9  | 300   | 0.794 | 0.745    | 92.8      |
| 10 | 300   | 0.781 | 0.732    | 91.2      |
| 11 | 300   | 0.776 | 0.727    | 90.6      |
| 12 | 300   | 0.769 | 0.720    | 89.7      |
| 13 | 1000  | 0.705 | 0.656    | 81.7      |
| 14 | 1000  | 0.726 | 0.677    | 84.3      |
| 15 | 1000  | 0.716 | 0.667    | 83.1      |
| 16 | 1000  | 0.712 | 0.663    | 82.6      |
