# Supplementary material for: Effects of shokyo ( Zingiberis Rhizoma ) and kankyo ( Zingiberis Processum Rhizoma ) on prostaglandin E 2 production in lipopolysaccharide-treated mouse macrophage RAW264.7 cells
Source: PeerJ journal article supplement (doi:10.7717/peerj.7725), 2019-09-17
Supplement: raw_data_Fig1.zip [file raw_data_Fig1.zip]

- Exp. 30
- Condition
  - drug1: kankyo (ug/ml)
  - experimental No. 4
  - treatment: 24h
- Measurement
  - WST-8
  - Date: 2017.11.8
- Cells
  - cells: RAW264.7, passages: NA
  - cell numbers:  $5 \times 10^4$  cells/well

|   | drug1 | mean  | SD  |
|---|-------|-------|-----|
| 1 | 0     | 100.0 | 0.6 |
| 2 | 100   | 101.9 | 0.6 |
| 3 | 300   | 100.1 | 0.5 |
| 4 | 1000  | 87.8  | 1.4 |

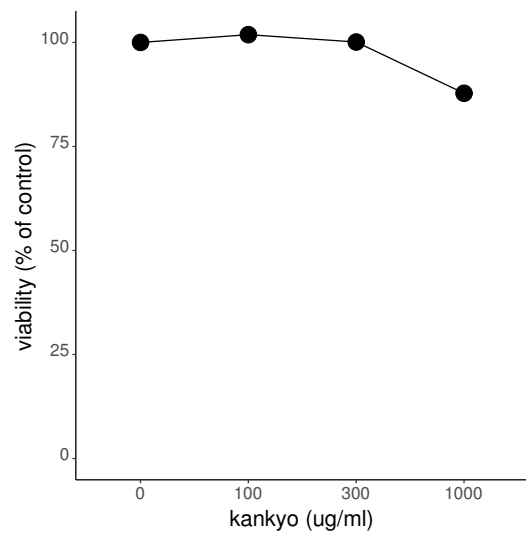

|   | OD    | mean  |
|---|-------|-------|
| 1 | 0.048 | 0.050 |
| 2 | 0.049 |       |
| 3 | 0.053 |       |
| 4 | 0.049 |       |
| 5 | 0.049 |       |
| 6 | 0.050 |       |
| 7 | 0.050 |       |
| 8 | 0.048 |       |

|    | drug1 | OD    | OD-blank | viability |
|----|-------|-------|----------|-----------|
| 1  | 0     | 0.769 | 0.720    | 99.6      |
| 2  | 0     | 0.767 | 0.718    | 99.3      |
| 3  | 0     | 0.776 | 0.727    | 100.6     |
| 4  | 0     | 0.776 | 0.727    | 100.6     |
| 5  | 100   | 0.784 | 0.735    | 101.7     |
| 6  | 100   | 0.781 | 0.732    | 101.2     |
| 7  | 100   | 0.786 | 0.737    | 101.9     |
| 8  | 100   | 0.791 | 0.742    | 102.6     |
| 9  | 300   | 0.775 | 0.726    | 100.4     |
| 10 | 300   | 0.775 | 0.726    | 100.4     |
| 11 | 300   | 0.768 | 0.719    | 99.4      |
| 12 | 300   | 0.773 | 0.724    | 100.1     |
| 13 | 1000  | 0.681 | 0.632    | 87.4      |
| 14 | 1000  | 0.694 | 0.644    | 89.2      |
| 15 | 1000  | 0.689 | 0.639    | 88.5      |
| 16 | 1000  | 0.671 | 0.622    | 86.0      |
