# Supplementary material for: Effects of shokyo ( Zingiberis Rhizoma ) and kankyo ( Zingiberis Processum Rhizoma ) on prostaglandin E 2 production in lipopolysaccharide-treated mouse macrophage RAW264.7 cells
Source: PeerJ journal article supplement (doi:10.7717/peerj.7725), 2019-09-17
Supplement: raw_data_Fig2.zip [file raw_data_Fig2.zip]

- Exp. 30
- Condition
  - drug1: herb ()
  - experimental No. 4
  - treatment: 24h
- Measurement
  - PGE2
  - Date: 2017.11.16
- Cells
  - cells: RAW264.7, passages: NA
  - cell numbers:  $5 \times 10^4$  cells/well =  $25 \times 10^4$  cells/ml

|   | conc.  | OD    |
|---|--------|-------|
| 1 | 7.8    | 1.101 |
| 2 | 15.6   | 0.962 |
| 3 | 31.2   | 0.835 |
| 4 | 62.5   | 0.690 |
| 5 | 125.0  | 0.433 |
| 6 | 250.0  | 0.297 |
| 7 | 500.0  | 0.242 |
| 8 | 1000.0 | 0.205 |

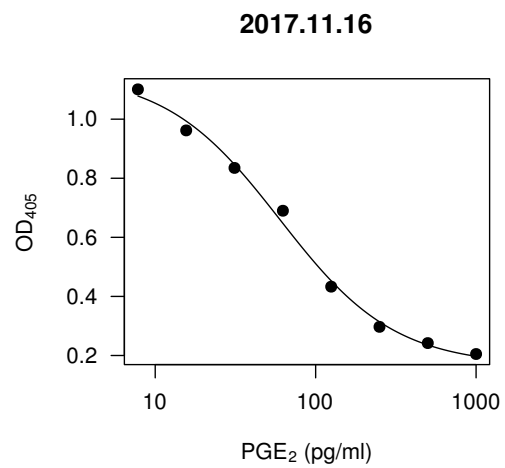

|   | drug1 | mean  | SD    |
|---|-------|-------|-------|
| 1 | 1     | 0.002 | 0.001 |
| 2 | 2     | 0.113 | 0.009 |
| 3 | 3     | 0.023 | 0.003 |
| 4 | 4     | 0.015 | 0.003 |
| 5 | 5     | 0.004 | 0.001 |
| 6 | 6     | 0.038 | 0.004 |
| 7 | 7     | 0.011 | 0.001 |
| 8 | 8     | 0.006 | 0.002 |

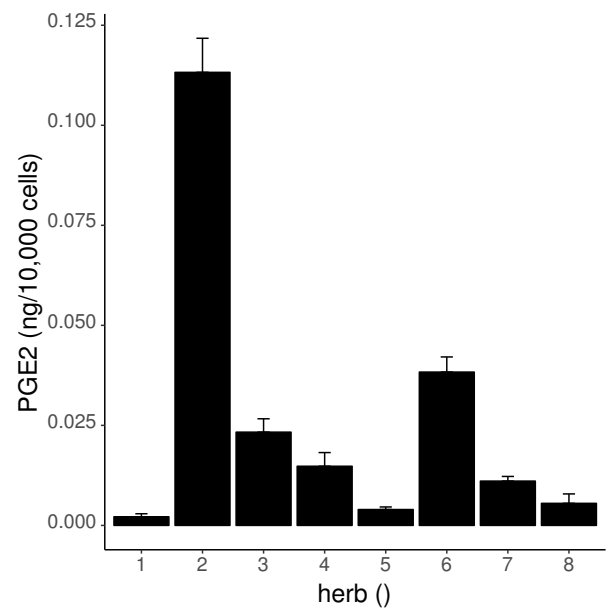

|    | drug1 | viability | dilution | OD    | conc. (pg/ml) | net (ng/ml) | (ng/10,000 cells) |
|----|-------|-----------|----------|-------|---------------|-------------|-------------------|
| 1  | 1     | 99.74     | 10       | 1.085 | 7.20          | 0.072       | 0.003             |
| 2  | 1     | 99.74     | 10       | 1.125 | 3.48          | 0.035       | 0.001             |
| 3  | 1     | 100.51    | 10       | 1.103 | 5.56          | 0.056       | 0.002             |
| 4  | 2     | 105.38    | 10       | 0.281 | 317.53        | 3.175       | 0.121             |
| 5  | 2     | 111.40    | 10       | 0.293 | 289.31        | 2.893       | 0.104             |
| 6  | 2     | 100.38    | 10       | 0.293 | 289.31        | 2.893       | 0.115             |
| 7  | 3     | 103.33    | 10       | 0.662 | 59.50         | 0.595       | 0.023             |
| 8  | 3     | 110.25    | 10       | 0.683 | 55.48         | 0.555       | 0.020             |
| 9  | 3     | 94.36     | 10       | 0.644 | 63.17         | 0.632       | 0.027             |
| 10 | 4     | 104.48    | 10       | 0.750 | 44.24         | 0.442       | 0.017             |
| 11 | 4     | 110.25    | 10       | 0.857 | 29.93         | 0.299       | 0.011             |
| 12 | 4     | 94.11     | 10       | 0.786 | 39.01         | 0.390       | 0.017             |
| 13 | 5     | 94.49     | 5        | 0.927 | 22.18         | 0.111       | 0.005             |
| 14 | 5     | 103.97    | 5        | 0.968 | 18.05         | 0.090       | 0.003             |
| 15 | 5     | 95.64     | 5        | 0.969 | 17.95         | 0.090       | 0.004             |
| 16 | 6     | 99.10     | 5        | 0.385 | 168.35        | 0.842       | 0.034             |
| 17 | 6     | 105.12    | 5        | 0.339 | 214.42        | 1.072       | 0.041             |
| 18 | 6     | 89.75     | 5        | 0.371 | 180.42        | 0.902       | 0.040             |
| 19 | 7     | 96.93     | 5        | 0.719 | 49.17         | 0.246       | 0.010             |
| 20 | 7     | 104.48    | 5        | 0.680 | 56.03         | 0.280       | 0.011             |
| 21 | 7     | 83.86     | 5        | 0.703 | 51.89         | 0.259       | 0.012             |
| 22 | 8     | 92.95     | 5        | 0.835 | 32.59         | 0.163       | 0.007             |
| 23 | 8     | 90.26     | 5        | 0.853 | 30.40         | 0.152       | 0.007             |
| 24 | 8     | 79.63     | 5        | 1.041 | 11.19         | 0.056       | 0.003             |
