# Supplementary material for: Effects of shokyo ( Zingiberis Rhizoma ) and kankyo ( Zingiberis Processum Rhizoma ) on prostaglandin E 2 production in lipopolysaccharide-treated mouse macrophage RAW264.7 cells
Source: PeerJ journal article supplement (doi:10.7717/peerj.7725), 2019-09-17
Supplement: raw_data_Fig2.zip [file raw_data_Fig2.zip]

- Exp. 30
- Condition
  - drug1: kankyo (ug/ml)
  - experimental No. 3
  - treatment: 24h
- Measurement
  - PGE2
  - Date: 2017.11.16
- Cells
  - cells: RAW264.7, passages: NA
  - cell numbers:  $5 \times 10^4$  cells/well =  $25 \times 10^4$  cells/ml

|   | conc.  | OD    |
|---|--------|-------|
| 1 | 7.8    | 1.041 |
| 2 | 15.6   | 0.871 |
| 3 | 31.2   | 0.695 |
| 4 | 62.5   | 0.545 |
| 5 | 125.0  | 0.403 |
| 6 | 250.0  | 0.294 |
| 7 | 500.0  | 0.222 |
| 8 | 1000.0 | 0.197 |

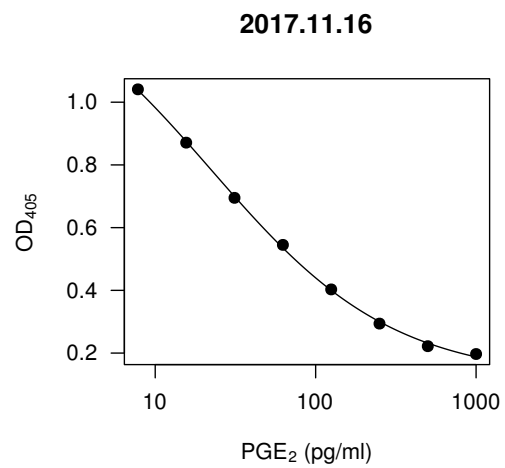

|   | drug1 | mean  | SD    |
|---|-------|-------|-------|
| 1 | 0     | 0.144 | 0.019 |
| 2 | 1     | 0.148 | 0.019 |
| 3 | 10    | 0.114 | 0.012 |
| 4 | 100   | 0.015 | 0.004 |

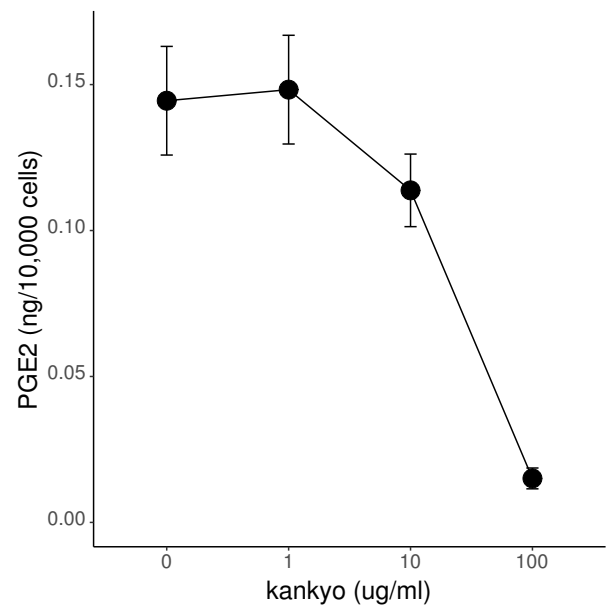

|    | drug1 | viability | dilution | OD    | conc. (pg/ml) | net (ng/ml) | (ng/10,000 cells) |
|----|-------|-----------|----------|-------|---------------|-------------|-------------------|
| 1  | 0     | 101.06    | 10       | 0.256 | 378.17        | 3.782       | 0.150             |
| 2  | 0     | 99.84     | 10       | 0.251 | 399.15        | 3.992       | 0.160             |
| 3  | 0     | 99.10     | 10       | 0.277 | 306.73        | 3.067       | 0.124             |
| 4  | 1     | 101.19    | 10       | 0.269 | 331.19        | 3.312       | 0.131             |
| 5  | 1     | 101.68    | 10       | 0.245 | 426.92        | 4.269       | 0.168             |
| 6  | 1     | 95.41     | 10       | 0.264 | 348.10        | 3.481       | 0.146             |
| 7  | 10    | 100.45    | 10       | 0.277 | 306.73        | 3.067       | 0.122             |
| 8  | 10    | 99.71     | 10       | 0.280 | 298.29        | 2.983       | 0.120             |
| 9  | 10    | 98.98     | 10       | 0.302 | 246.15        | 2.462       | 0.099             |
| 10 | 100   | 95.29     | 10       | 0.672 | 34.87         | 0.349       | 0.015             |
| 11 | 100   | 98.49     | 10       | 0.603 | 46.39         | 0.464       | 0.019             |
| 12 | 100   | 93.82     | 10       | 0.731 | 27.55         | 0.275       | 0.012             |
