# Supplementary material for: Effects of shokyo ( Zingiberis Rhizoma ) and kankyo ( Zingiberis Processum Rhizoma ) on prostaglandin E 2 production in lipopolysaccharide-treated mouse macrophage RAW264.7 cells
Source: PeerJ journal article supplement (doi:10.7717/peerj.7725), 2019-09-17
Supplement: raw_data_Fig2.zip [file raw_data_Fig2.zip]

- Exp. 30
- Condition
  - drug1: shokyo (ug/ml)
  - experimental No. 3
  - treatment: 24h
- Measurement
  - PGE2
  - Date: 2017.11.16
- Cells
  - cells: RAW264.7, passages: NA
  - cell numbers:  $5 \times 10^4$  cells/well =  $25 \times 10^4$  cells/ml

|   | conc.  | OD    |
|---|--------|-------|
| 1 | 7.8    | 1.041 |
| 2 | 15.6   | 0.871 |
| 3 | 31.2   | 0.695 |
| 4 | 62.5   | 0.545 |
| 5 | 125.0  | 0.403 |
| 6 | 250.0  | 0.294 |
| 7 | 500.0  | 0.222 |
| 8 | 1000.0 | 0.197 |

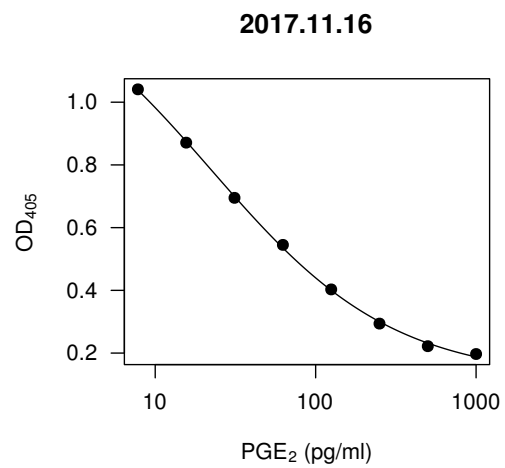

|   | drug1 | mean  | SD    |
|---|-------|-------|-------|
| 1 | 0     | 0.139 | 0.021 |
| 2 | 1     | 0.146 | 0.017 |
| 3 | 10    | 0.100 | 0.008 |
| 4 | 100   | 0.027 | 0.005 |

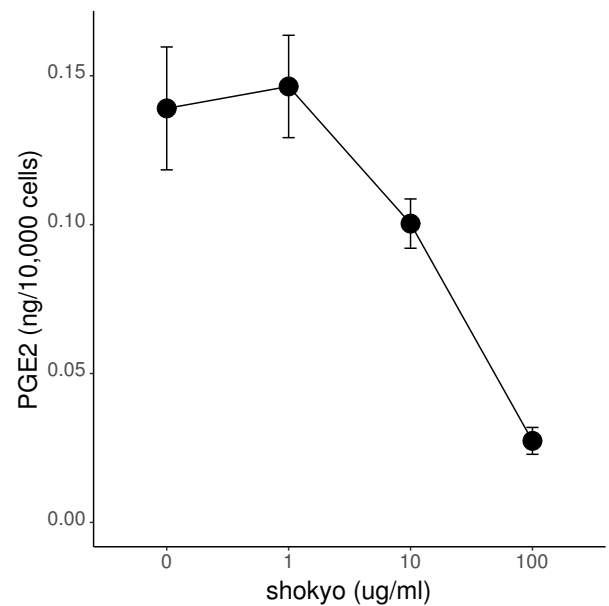

|    | drug1 | viability | dilution | OD    | conc. (pg/ml) | net (ng/ml) | (ng/10,000 cells) |
|----|-------|-----------|----------|-------|---------------|-------------|-------------------|
| 1  | 0     | 99.18     | 10       | 0.255 | 382.23        | 3.822       | 0.154             |
| 2  | 0     | 99.42     | 10       | 0.259 | 366.42        | 3.664       | 0.147             |
| 3  | 0     | 101.40    | 10       | 0.282 | 292.86        | 2.929       | 0.116             |
| 4  | 1     | 99.92     | 10       | 0.260 | 362.64        | 3.626       | 0.145             |
| 5  | 1     | 100.54    | 10       | 0.248 | 412.66        | 4.127       | 0.164             |
| 6  | 1     | 100.04    | 10       | 0.271 | 324.79        | 3.248       | 0.130             |
| 7  | 10    | 98.43     | 10       | 0.291 | 270.26        | 2.703       | 0.110             |
| 8  | 10    | 100.78    | 10       | 0.306 | 238.21        | 2.382       | 0.095             |
| 9  | 10    | 98.56     | 10       | 0.306 | 238.21        | 2.382       | 0.097             |
| 10 | 100   | 99.30     | 10       | 0.541 | 60.86         | 0.609       | 0.025             |
| 11 | 100   | 101.77    | 10       | 0.531 | 63.71         | 0.637       | 0.025             |
| 12 | 100   | 101.77    | 10       | 0.476 | 82.90         | 0.829       | 0.033             |
