# Supplementary material for: Effects of shokyo ( Zingiberis Rhizoma ) and kankyo ( Zingiberis Processum Rhizoma ) on prostaglandin E 2 production in lipopolysaccharide-treated mouse macrophage RAW264.7 cells
Source: PeerJ journal article supplement (doi:10.7717/peerj.7725), 2019-09-17
Supplement: raw_data_Fig2.zip [file raw_data_Fig2.zip]

# Statistical analysis

Toshiaki Ara

## 1 shokyo/kankyo -> PGE<sub>2</sub>

### 1.1 simultaneous treatment

Simultaneous Tests for General Linear Hypotheses

Multiple Comparisons of Means: Dunnett Contrasts

Fit: `lm(formula = adjusted ~ drug1, data = dat_sim)`

Linear Hypotheses:

|            | Estimate  | Std. Error | t value | Pr(> t )     |
|------------|-----------|------------|---------|--------------|
| 3 - 2 == 0 | -0.089918 | 0.004599   | -19.55  | 2.12e-06 *** |
| 4 - 2 == 0 | -0.098440 | 0.004599   | -21.40  | 1.24e-06 *** |

---

Signif. codes: 0 '\*\*\*' 0.001 '\*\*' 0.01 '\*' 0.05 '.' 0.1 ' ' 1  
(Adjusted p values reported -- single-step method)

### 1.2 sequential treatment

Simultaneous Tests for General Linear Hypotheses

Multiple Comparisons of Means: Dunnett Contrasts

```
Fit: lm(formula = adjusted ~ drug1, data = dat_seq)
```

Linear Hypotheses:

|            | Estimate  | Std. Error | t value | Pr(> t )     |
|------------|-----------|------------|---------|--------------|
| 3 - 2 == 0 | -0.089918 | 0.004599   | -19.55  | 2.12e-06 *** |
| 4 - 2 == 0 | -0.098440 | 0.004599   | -21.40  | 1.24e-06 *** |

---

Signif. codes: 0 '\*\*\*' 0.001 '\*\*' 0.01 '\*' 0.05 '.' 0.1 ' ' 1

(Adjusted p values reported -- single-step method)

## 2 shokyo/kankyo -> PGE<sub>2</sub> (conc-dependent)

### 2.1 shokyo

Simultaneous Tests for General Linear Hypotheses

Multiple Comparisons of Means: Dunnett Contrasts

```
Fit: lm(formula = adjusted ~ drug1, data = dat)
```

Linear Hypotheses:

|              | Estimate  | Std. Error | t value | Pr(> t )   |
|--------------|-----------|------------|---------|------------|
| 1 - 0 == 0   | 0.007369  | 0.011620   | 0.634   | 0.8615     |
| 10 - 0 == 0  | -0.038685 | 0.011620   | -3.329  | 0.0258 *   |
| 100 - 0 == 0 | -0.111654 | 0.011620   | -9.609  | <0.001 *** |

---

Signif. codes: 0 '\*\*\*' 0.001 '\*\*' 0.01 '\*' 0.05 '.' 0.1 ' ' 1

(Adjusted p values reported -- single-step method)

## 2.2 kankyo

Simultaneous Tests for General Linear Hypotheses

Multiple Comparisons of Means: Dunnett Contrasts

Fit: `lm(formula = adjusted ~ drug1, data = dat)`

Linear Hypotheses:

|              | Estimate  | Std. Error | t value | Pr(> t )   |
|--------------|-----------|------------|---------|------------|
| 1 - 0 == 0   | 0.003798  | 0.011976   | 0.317   | 0.977      |
| 10 - 0 == 0  | -0.030709 | 0.011976   | -2.564  | 0.080 .    |
| 100 - 0 == 0 | -0.129395 | 0.011976   | -10.805 | <0.001 *** |

---

Signif. codes: 0 '\*\*\*' 0.001 '\*\*' 0.01 '\*' 0.05 '.' 0.1 ' ' 1

(Adjusted p values reported -- single-step method)
