# Supplementary material for: Effects of shokyo ( Zingiberis Rhizoma ) and kankyo ( Zingiberis Processum Rhizoma ) on prostaglandin E 2 production in lipopolysaccharide-treated mouse macrophage RAW264.7 cells
Source: PeerJ journal article supplement (doi:10.7717/peerj.7725), 2019-09-17
Supplement: raw_data_Fig3.zip [file raw_data_Fig3.zip]

## Sheet: Fig4A
	actin	cPLA2	annexin1	COX-2
(-)	29148.7	30176.6	29380.3	669.983
LPS	24661.4	19021.1	23498.6	28384.2
LPS+shokyo	28358.7	18723.4	21076.6	26493.3
LPS+kankyo	29373.5	16880.8	21719.3	33372.8
LPS+Dex	32087.1	22566.3	31244.7	3261.35
		cPLA2	annexin1	COX-2
(-)	1	1.03527	1.00795	0.022985
LPS	1	0.771291	0.952848	1.15096
LPS+shokyo	1	0.660236	0.743215	0.934222
LPS+kankyo	1	0.574697	0.739419	1.13615
LPS+Dex	1	0.703281	0.973744	0.10164
		cPLA2	annexin1	COX-2
(-)		1.34225	1.05783	0.0199703
LPS		1	1	1
LPS+shokyo		0.856015	0.779993	0.811691
LPS+kankyo		0.74511	0.776009	0.987138
LPS+Dex		0.911823	1.02193	0.0883093
