# Supplementary material for: Effects of shokyo ( Zingiberis Rhizoma ) and kankyo ( Zingiberis Processum Rhizoma ) on prostaglandin E 2 production in lipopolysaccharide-treated mouse macrophage RAW264.7 cells
Source: PeerJ journal article supplement (doi:10.7717/peerj.7725), 2019-09-17
Supplement: raw_data_Fig4.zip [file raw_data_Fig4.zip]

## Sheet: Fig7
	ERK	pERK
(-)	23983.6	948.225
LPS	26603	28004.1
LPS+shokyo	25265.9	27529.1
LPS+kankyo	27550.3	25322
LPS+PD98059	25478.2	11848.1
		pERK
(-)		0.0395365
LPS		1.05267
LPS+shokyo		1.08958
LPS+kankyo		0.919119
LPS+PD98059		0.465028
		pERK
(-)		0.0375583
LPS		1
LPS+shokyo		1.03506
LPS+kankyo		0.873133
LPS+PD98059		0.441761
