# Supplementary material for: Effects of shokyo ( Zingiberis Rhizoma ) and kankyo ( Zingiberis Processum Rhizoma ) on prostaglandin E 2 production in lipopolysaccharide-treated mouse macrophage RAW264.7 cells
Source: PeerJ journal article supplement (doi:10.7717/peerj.7725), 2019-09-17
Supplement: raw_data_Fig6.zip [file raw_data_Fig6.zip]

## Sheet: Fig7
	p65	p-p65
(-)	26126.7	2548.22
LPS	31099.8	19543.8
LPS+6-SG (0.1)	30397.4	20248.4
LPS+6-SG (1)	29237.4	21157.3
LPS+6-SG (10)	30064.5	21546.1
LPS+Bay	29256.3	12513.1
		p-p65
(-)		0.0975335
LPS		0.628421
LPS+6-SG (0.1)		0.666123
LPS+6-SG (1)		0.723638
LPS+6-SG (10)		0.716661
LPS+Bay		0.427707
		p-p65
(-)		0.155204
LPS		1
LPS+6-SG (0.1)		1.06
LPS+6-SG (1)		1.15152
LPS+6-SG (10)		1.14042
LPS+Bay		0.680606
