# Supplementary material for: Effects of shokyo ( Zingiberis Rhizoma ) and kankyo ( Zingiberis Processum Rhizoma ) on prostaglandin E 2 production in lipopolysaccharide-treated mouse macrophage RAW264.7 cells
Source: PeerJ journal article supplement (doi:10.7717/peerj.7725), 2019-09-17
Supplement: raw_data_SFig2_3.zip [file raw_data_SFig2_3.zip]

- Exp. 30
- Condition
  - drug1: herb ()
  - experimental No. 6
  - treatment: 24h
- Measurement
  - LTB4
  - Date: 2017.11.24
- Cells
  - cells: RAW264.7, passages: NA
  - cell numbers:  $5 \times 10^4$  cells/well =  $25 \times 10^4$  cells/ml

|   | conc.  | OD    |
|---|--------|-------|
| 1 | 15.6   | 1.191 |
| 2 | 31.2   | 1.010 |
| 3 | 62.5   | 0.861 |
| 4 | 125.0  | 0.618 |
| 5 | 250.0  | 0.446 |
| 6 | 500.0  | 0.355 |
| 7 | 1000.0 | 0.282 |
| 8 | 2000.0 | 0.248 |

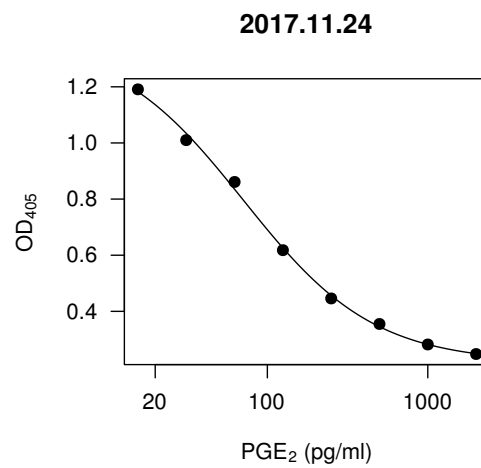

|   | drug1 | mean  | SD    |
|---|-------|-------|-------|
| 1 | 1     | 0.002 | 0.000 |
| 2 | 2     | 0.002 | 0.001 |
| 3 | 3     | 0.001 | 0.000 |
| 4 | 4     | 0.002 | 0.000 |

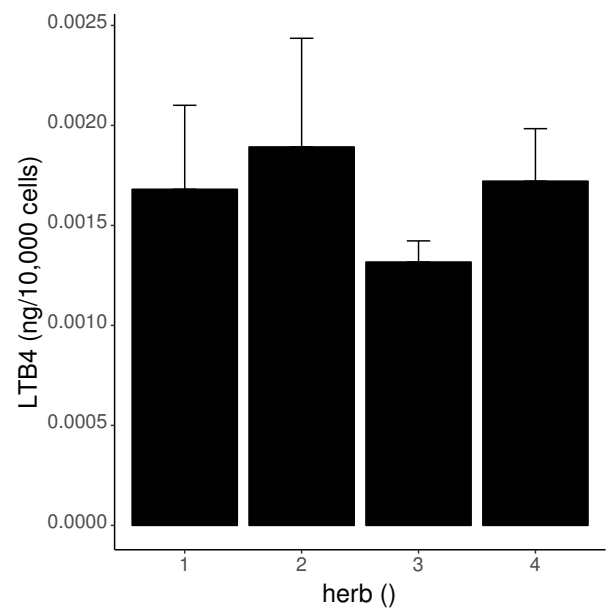

|    | drug1 | viability | dilution | OD    | conc. (pg/ml) | net (ng/ml) | (ng/10,000 cells) |
|----|-------|-----------|----------|-------|---------------|-------------|-------------------|
| 1  | 2     | 96.34     | 1        | 0.847 | 60.08         | 0.060       | 0.002             |
| 2  | 2     | 96.46     | 1        | 0.953 | 42.08         | 0.042       | 0.002             |
| 3  | 2     | 98.09     | 1        | 1.002 | 35.28         | 0.035       | 0.001             |
| 4  | 3     | 98.34     | 1        | 1.038 | 30.75         | 0.031       | 0.001             |
| 5  | 3     | 97.34     | 1        | 1.004 | 35.02         | 0.035       | 0.001             |
| 6  | 3     | 97.84     | 1        | 1.037 | 30.87         | 0.031       | 0.001             |
| 7  | 4     | 98.46     | 1        | 1.001 | 35.41         | 0.035       | 0.001             |
| 8  | 4     | 98.71     | 1        | 0.913 | 48.28         | 0.048       | 0.002             |
| 9  | 4     | 99.83     | 1        | 0.939 | 44.18         | 0.044       | 0.002             |
| 10 | 1     | 100.33    | 1        | 0.883 | 53.37         | 0.053       | 0.002             |
| 11 | 1     | 97.84     | 1        | 0.970 | 39.63         | 0.040       | 0.002             |
| 12 | 1     | 101.83    | 1        | 1.020 | 32.97         | 0.033       | 0.001             |
