# Supplementary material for: Effects of shokyo ( Zingiberis Rhizoma ) and kankyo ( Zingiberis Processum Rhizoma ) on prostaglandin E 2 production in lipopolysaccharide-treated mouse macrophage RAW264.7 cells
Source: PeerJ journal article supplement (doi:10.7717/peerj.7725), 2019-09-17
Supplement: raw_data_SFig2_3.zip [file raw_data_SFig2_3.zip]

# Statistical analysis

*Toshiaki Ara*

## LOX activity

simultaneous treatment

filename

030\_herb\_LTB4\_5\_raw.csv

multiple comparison by Dunnett method

Simultaneous Tests for General Linear Hypotheses

Multiple Comparisons of Means: Dunnett Contrasts

Fit: `lm(formula = adjusted ~ drug1, data = dat1)`

Linear Hypotheses:

|            | Estimate  | Std. Error | t value | Pr(> t ) |
|------------|-----------|------------|---------|----------|
| 3 - 2 == 0 | 0.0003691 | 0.0002169  | 1.702   | 0.230    |
| 4 - 2 == 0 | 0.0003256 | 0.0002169  | 1.501   | 0.298    |

(Adjusted p values reported -- single-step method)

sequential treatment

filename

030\_herb\_LTB4\_6\_raw.csv

multiple comparison by Dunnett method

Simultaneous Tests for General Linear Hypotheses

Multiple Comparisons of Means: Dunnett Contrasts

Fit: `lm(formula = adjusted ~ drug1, data = dat1)`

Linear Hypotheses:

|            | Estimate   | Std. Error | t value | Pr(> t ) |
|------------|------------|------------|---------|----------|
| 3 - 2 == 0 | -0.0005754 | 0.0002887  | -1.993  | 0.157    |
| 4 - 2 == 0 | -0.0001710 | 0.0002887  | -0.592  | 0.786    |

(Adjusted p values reported -- single-step method)
