# Supplementary material for: Effects of shokyo ( Zingiberis Rhizoma ) and kankyo ( Zingiberis Processum Rhizoma ) on prostaglandin E 2 production in lipopolysaccharide-treated mouse macrophage RAW264.7 cells
Source: PeerJ journal article supplement (doi:10.7717/peerj.7725), 2019-09-17
Supplement: raw_data_SFig2_3.zip [file raw_data_SFig2_3.zip]

- Exp. 30
- Condition
  - drug1: herb ()
  - experimental No. 5
  - treatment: 24h
- Measurement
  - LTB4
  - Date: 2017.11.24
- Cells
  - cells: RAW264.7, passages: NA
  - cell numbers:  $5 \times 10^4$  cells/well =  $25 \times 10^4$  cells/ml

|   | conc.  | OD    |
|---|--------|-------|
| 1 | 15.6   | 1.191 |
| 2 | 31.2   | 1.010 |
| 3 | 62.5   | 0.861 |
| 4 | 125.0  | 0.618 |
| 5 | 250.0  | 0.446 |
| 6 | 500.0  | 0.355 |
| 7 | 1000.0 | 0.282 |
| 8 | 2000.0 | 0.248 |

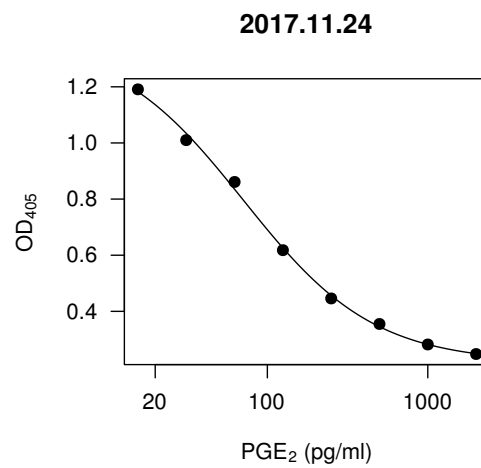

|   | drug1 | mean  | SD    |
|---|-------|-------|-------|
| 1 | 1     | 0.001 | 0.000 |
| 2 | 2     | 0.001 | 0.000 |
| 3 | 3     | 0.002 | 0.000 |
| 4 | 4     | 0.002 | 0.000 |

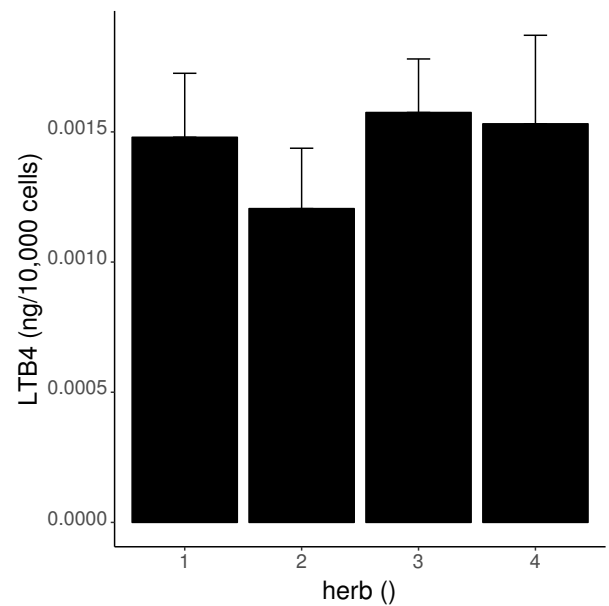

|    | drug1 | viability | dilution | OD    | conc. (pg/ml) | net (ng/ml) | (ng/10,000 cells) |
|----|-------|-----------|----------|-------|---------------|-------------|-------------------|
| 1  | 2     | 100.28    | 1        | 1.101 | 23.61         | 0.024       | 0.001             |
| 2  | 2     | 100.16    | 1        | 1.024 | 32.47         | 0.032       | 0.001             |
| 3  | 2     | 100.52    | 1        | 1.007 | 34.63         | 0.035       | 0.001             |
| 4  | 3     | 101.48    | 1        | 0.989 | 37.01         | 0.037       | 0.001             |
| 5  | 3     | 99.56     | 1        | 0.933 | 45.10         | 0.045       | 0.002             |
| 6  | 3     | 101.12    | 1        | 0.991 | 36.74         | 0.037       | 0.001             |
| 7  | 4     | 96.80     | 1        | 1.019 | 33.09         | 0.033       | 0.001             |
| 8  | 4     | 100.76    | 1        | 1.021 | 32.84         | 0.033       | 0.001             |
| 9  | 4     | 98.12     | 1        | 0.920 | 47.15         | 0.047       | 0.002             |
| 10 | 1     | 100.88    | 1        | 1.001 | 35.41         | 0.035       | 0.001             |
| 11 | 1     | 98.72     | 1        | 1.031 | 31.60         | 0.032       | 0.001             |
| 12 | 1     | 100.40    | 1        | 0.940 | 44.02         | 0.044       | 0.002             |
