# Supplementary material for: Effects of shokyo ( Zingiberis Rhizoma ) and kankyo ( Zingiberis Processum Rhizoma ) on prostaglandin E 2 production in lipopolysaccharide-treated mouse macrophage RAW264.7 cells
Source: PeerJ journal article supplement (doi:10.7717/peerj.7725), 2019-09-17
Supplement: SupplFig.pdf [file SupplFig.pdf]

A

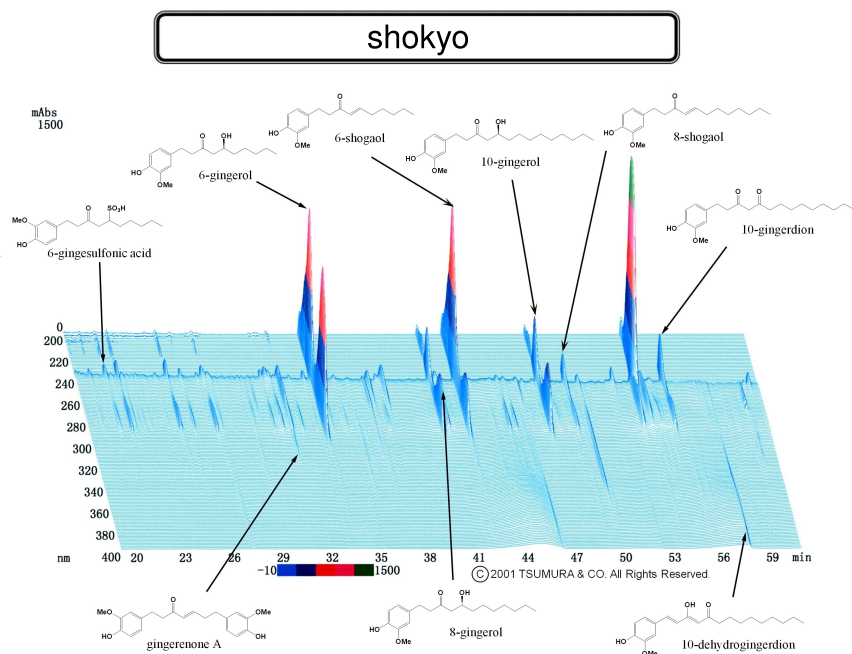

B

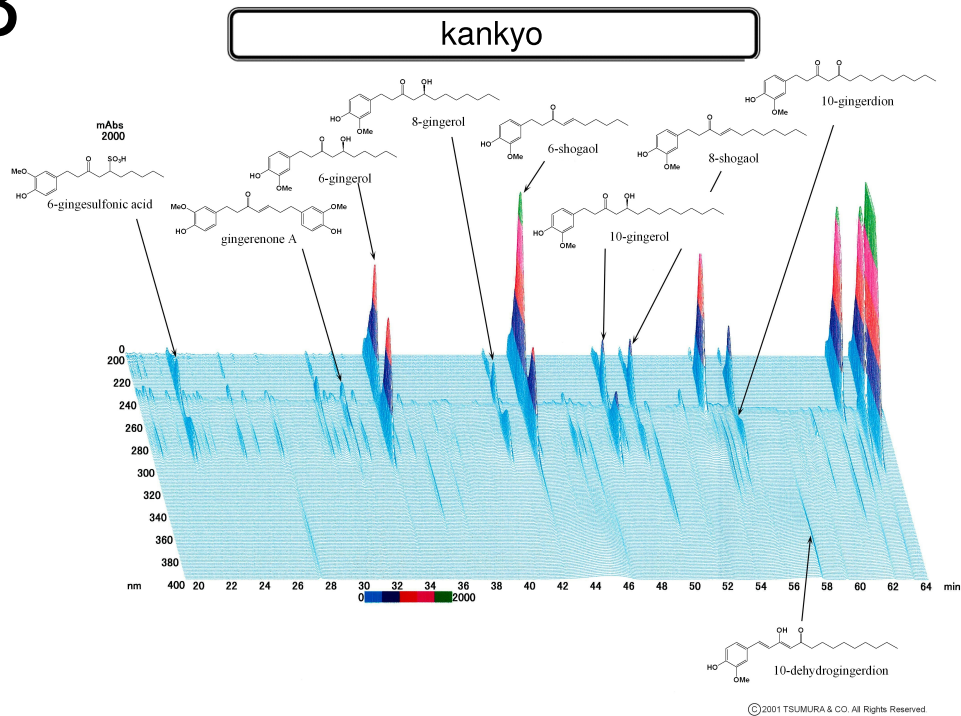

Supplemental Figure 1: 3D-HPLC profiles of shokyo (A) and kankyo (B).

**A**

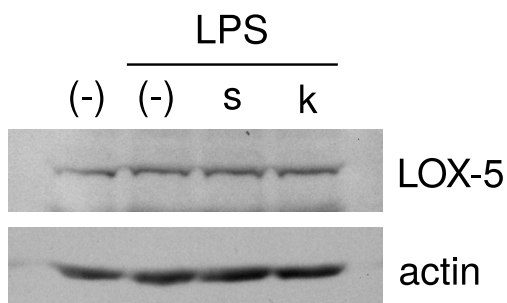

**B**

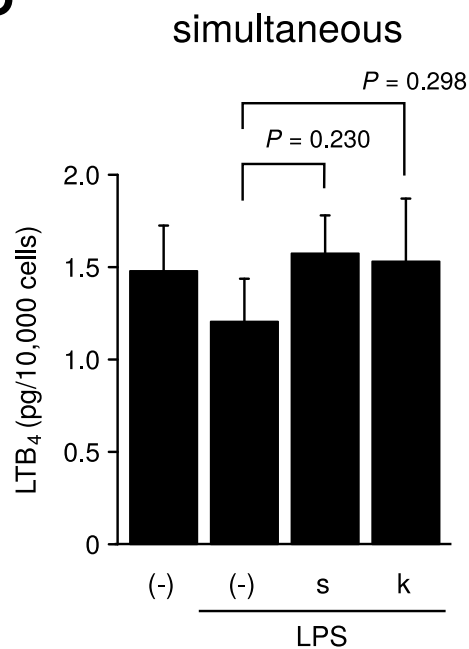

**C**

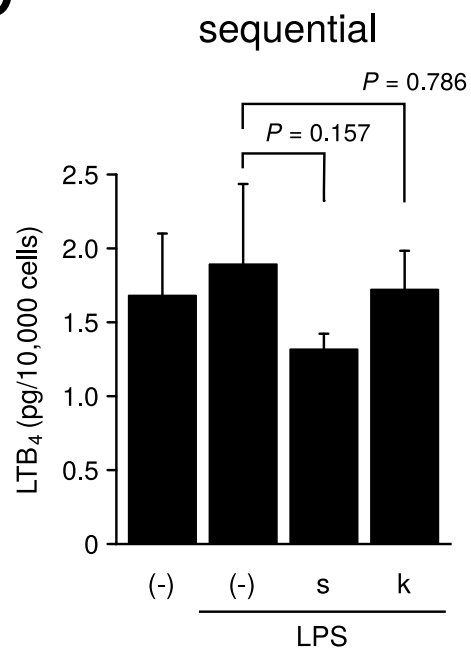

Supplemental Figure 2: Effect of shokyo and kankyo on lipoxygenase (LOX) pathway in RAW264.7 cells. (A) LOX-5 expression, and (B) LOX activity. The same samples in Figure 3 were used. s: shokyo, k: kankyo.

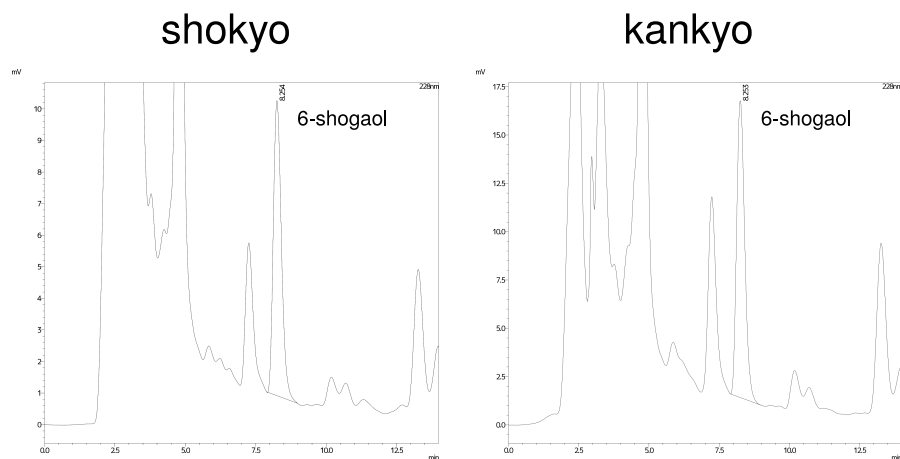

Analysis of [6]-Shogaol standard

| conc. (uM) | Peak Area |
|------------|-----------|
| 0.1        | 5732      |
| 1          | 62025     |
| 10         | 629091    |
| 50         | 3184242   |

slope 63729  
intercept -3193.7

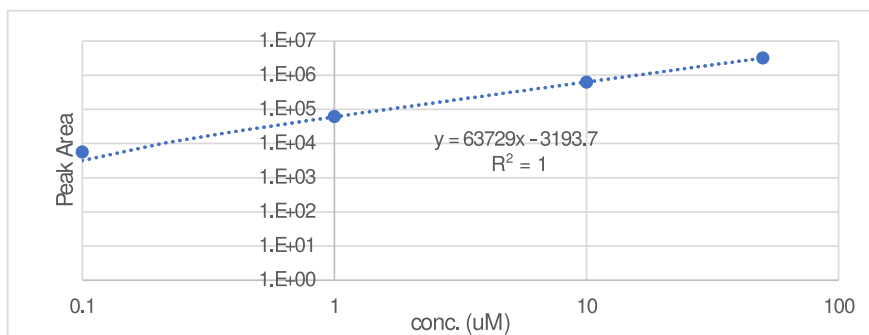

Results

|        | ID   | sample (mL) | Constant volume (mL) | Peak Area | [6]-Shogaol conc. (uM) |
|--------|------|-------------|----------------------|-----------|------------------------|
| shokyo | 4412 | 1           | 1                    | 186030    | 2.97                   |
| kankyo | 4413 | 1           | 1                    | 307051    | 4.87                   |

Supplemental Figure 3: Quantification of 6-shogaol in herbs by HPLC. Samples (5 mg/ml of shokyo and kankyo) in culture medium were subjected to HPLC as described in Materials and Methods.
