# Supplementary figures and images for: Effects of shokyo ( Zingiberis Rhizoma ) and kankyo ( Zingiberis Processum Rhizoma ) on prostaglandin E 2 production in lipopolysaccharide-treated mouse macrophage RAW264.7 cells
Source: PeerJ journal article supplement (doi:10.7717/peerj.7725), 2019-09-17

[6]-Shogaolの分析

検量線

| 濃度 (uM) | ピーク面積   |
|---------|---------|
| 0.1     | 5732    |
| 1       | 62025   |
| 10      | 629091  |
| 50      | 3184242 |

傾き 63729  
切片 -3193.7

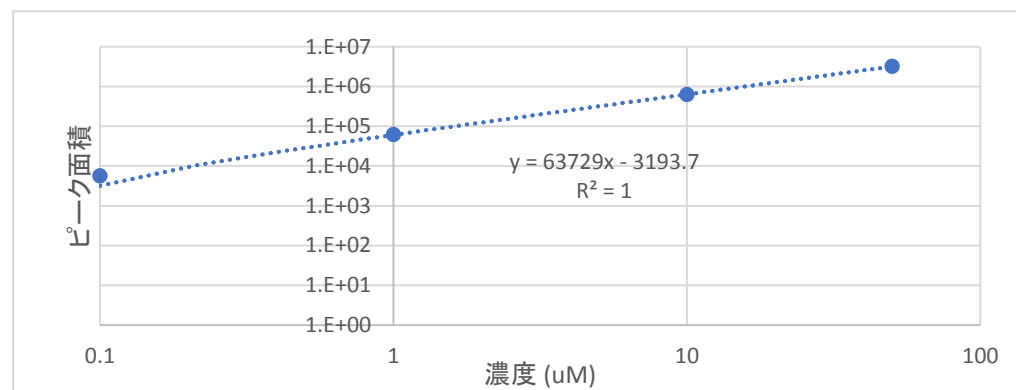

定量結果

|        | 受付番号 | 試料分取量 (mL) | 定容量 (mL) | ピーク面積  | [6]-Shogaol 濃度 (uM) |
|--------|------|------------|----------|--------|---------------------|
| ショウキョウ | 4412 | 1          | 1        | 186030 | 2.97                |
| カンキョウ  | 4413 | 1          | 1        | 307051 | 4.87                |

Supplement: raw_data_SFig2_3.zip [file raw_data_SFig2_3.zip]
